# Supplementary material
Source: PubMed Central journal article supplement (PMC4238007)
Supplement: supp_db14-0298_DB140298SupplementaryData.pdf [file supp_db14-0298_DB140298SupplementaryData.pdf]

## Regulation of Inflammatory Phenotype in Macrophages by a Diabetes-Induced Long Noncoding RNA

Marpadga A. Reddy<sup>1\*</sup>, Zhuo Chen<sup>1</sup>, Jung Tak Park<sup>1,2</sup>, Mei Wang<sup>1</sup>, Linda Lanting<sup>1</sup>, Qiang Zhang<sup>1</sup>, Kirti Bhatt<sup>1</sup>, Amy Leung<sup>1</sup>, Xiwei Wu<sup>1</sup>, Sumanth Putta<sup>1</sup>, Pål Sætrom<sup>3</sup>, Sridevi Devaraj<sup>4</sup> and Rama Natarajan<sup>1\*</sup>

<sup>1</sup> Department of Diabetes and Metabolic Diseases Research, Division of Molecular Diabetes Research, Beckman Research Institute of City of Hope, Duarte, CA. <sup>2</sup>Current address: Department of Internal Medicine, College of Medicine, Yonsei University, Seoul, Korea. <sup>3</sup>Departments of Computer and Information Science, Cancer Research and Molecular Medicine, Norwegian University of Science and Technology, Trondheim, Norway (P.S.), <sup>4</sup>Department of Pathology and Immunology, Baylor College of Medicine and Texas Children's Hospital, Houston, TX.

**Supplementary Figure 1.** Expression of pro-inflammatory genes and those associated with alternatively activated macrophages in BMMC(MC) and BMGM (GM). A-B. Bar graphs showing gene expression in BMGM from db/+ (A) and db/db (B) mice relative to respective BMMC. BMMs from db/+ and db/db mice were cultured in 10 ng/ml MCSF (BMMC) or 20 ng/ml GM-CSF (BMGM) for 7 days and expression of indicated genes were analyzed by RT-QPCR. Results were expressed as Fold over BMMC. Data showed elevated levels of inflammatory genes and reduced levels of alternatively activated genes in BMGM from both db/+ (A) and db/db (B) mice, consistent with M1 and M2 phenotypes of GM-CSF and MCSF differentiated cells respectively. Bar graph for Arg1 is shown truncated because its levels were >100 fold in BMGM vs BMMC. Mean±SEM (\*, p<0.05, n=4).

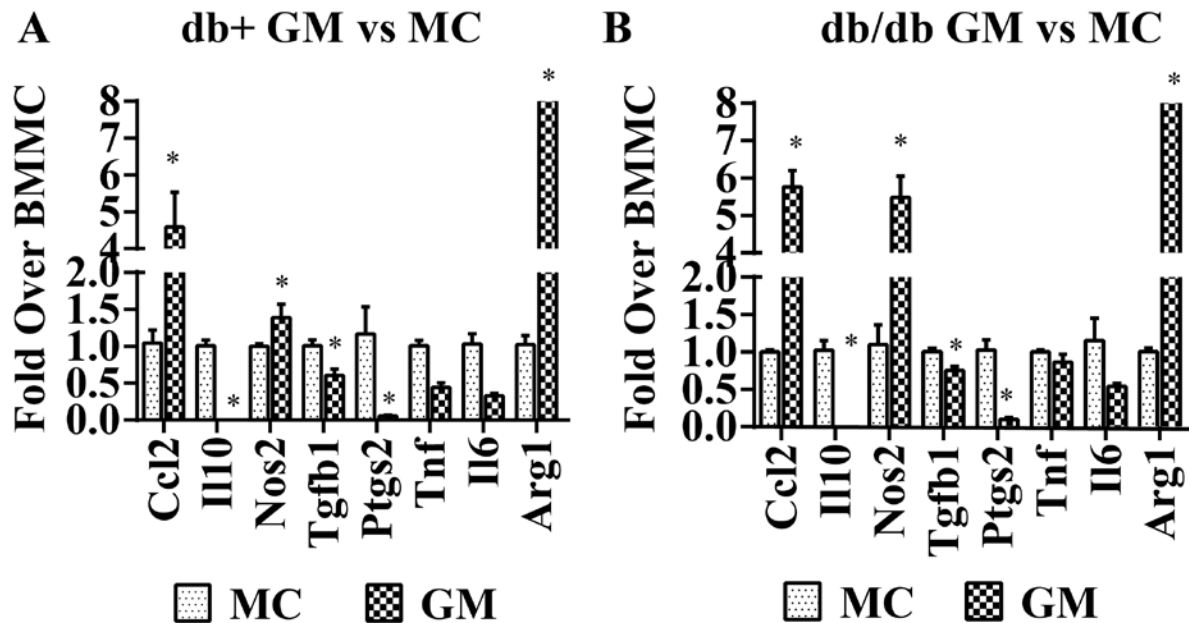

SUPPLEMENTARY DATA

**Supplementary Figure 2.** Results of RNA-seq analysis showing expression of Macrophage M1/M2 markers in BMGC, and differentially expressed genes in BMGM. A. Typical M1 gene expression levels in BMGM relative to BMGC. B. Typical M2 gene expression levels in BMGC relative to BMGM. C. *Csf1* and *Csf1R* expression levels are elevated in BMGC relative to BMGM. In contrast, expression of GM-CSF receptors (*Csf2rb* and *Csf2rb2*) was markedly reduced in BMGC. Global gene expression in BMGC and BMGM isolated from db/+ and db/db mice was analyzed by RNA-seq as indicated in the Methods section. Results shown further support the M1 and M2 phenotypes of BMGM and BMGC respectively. Relative levels of indicated genes are shown. Data represents log<sub>2</sub> ratio as indicated on the 'X' axis.

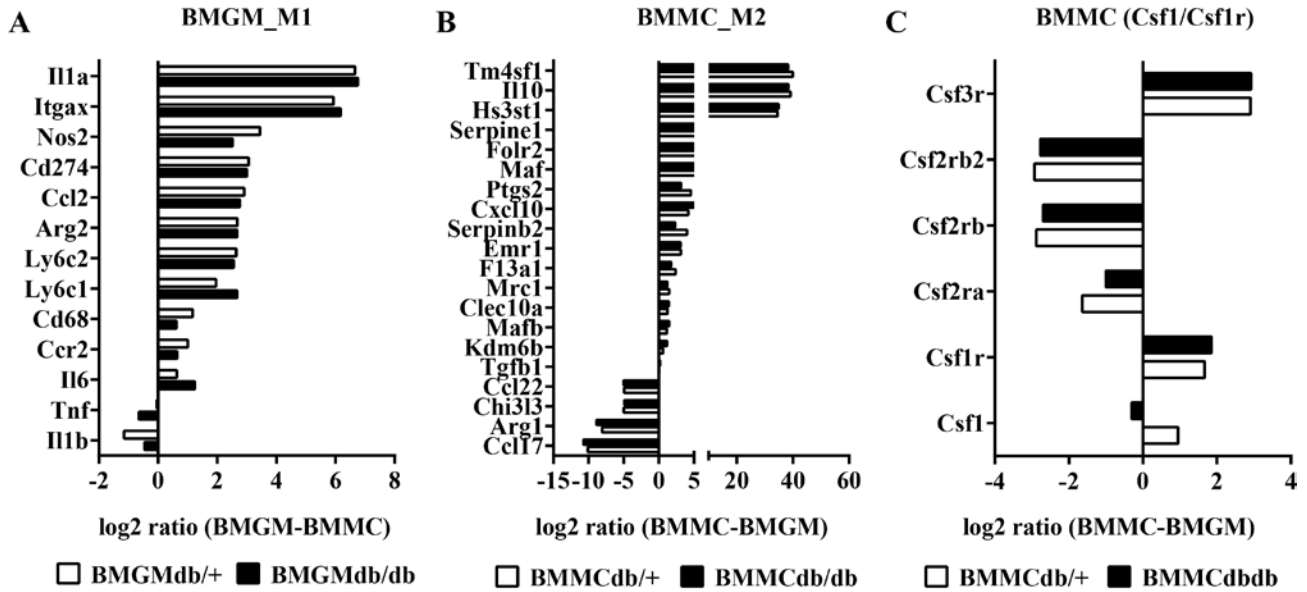

SUPPLEMENTARY DATA

**Supplementary Figure 3.** Flow cytometry data showing protein levels of macrophage markers in BMM. BMMC and BMGM from db/+ and db/db mice were stained with F4/80 (A), CD115 (B), CD11b (C) and CD11c (D) antibodies and FACS analyses were performed. Data represents % of cells positive for the indicated antibodies relative to total number of DAPI stained cells. A \*, p<0.05 (n=4). B-D (n=2). Flow cytometry experiments revealed that majority of BMMC were positive for F4/80, CD115 (CSF1R), CD11b and CD11c. Whereas in BMGM, cells positive for F4/80 and CD115 were reduced, but those positive for CD11c were moderately increased. BMMs were detached using Accutase, washed and resuspended in 100 ul of PBS containing 0.5% BSA (FACS buffer, FB). BMMs were blocked with anti-mouse CD16/32 Antibody (TruStain fcX™, Biolegend, San Diego, CA) for 20 min, then incubated for 30 min at 4°C with the indicated fluorescently labeled antibodies (purchased from Biolegend). Cells were then washed three times with FB, stained with DAPI and FACS analysis was performed by the Analytical Flow Cytometry core facility on an LSR Fortessa X-20 (BD Bioscience, San Diego, CA), with color compensation without dye, and single color stained cells. Data was analyzed using FlowJo software and results are shown as the % of DAPI stained cells.

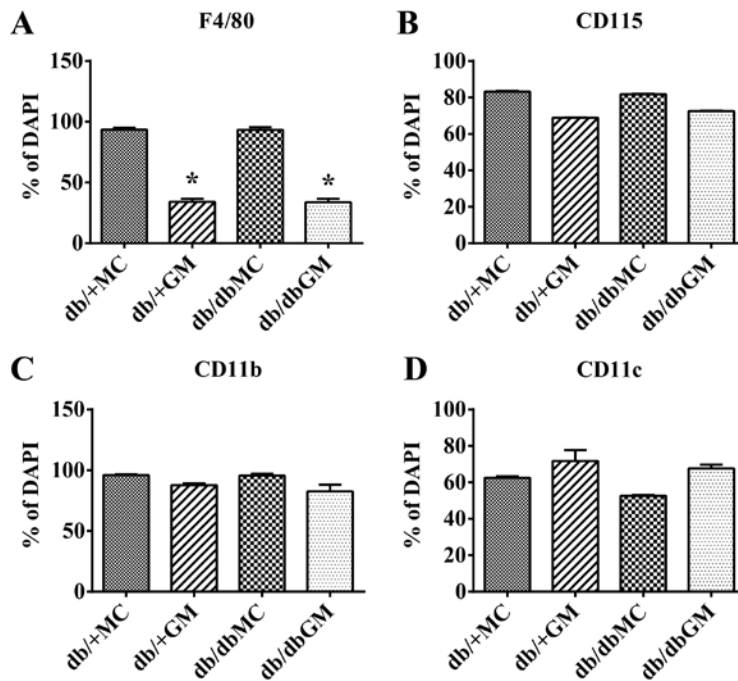

SUPPLEMENTARY DATA

**Supplementary Figure 4.** Scatter plot of differentially expressed RefSeq genes in db/dbBMGM vs db/+BMGM. RNA-seq data of BMGM from db/+ and db/db mice were analyzed as described in Methods section. Data represents log<sub>2</sub> ratio (db/dbBMGM-db/+BMGM).

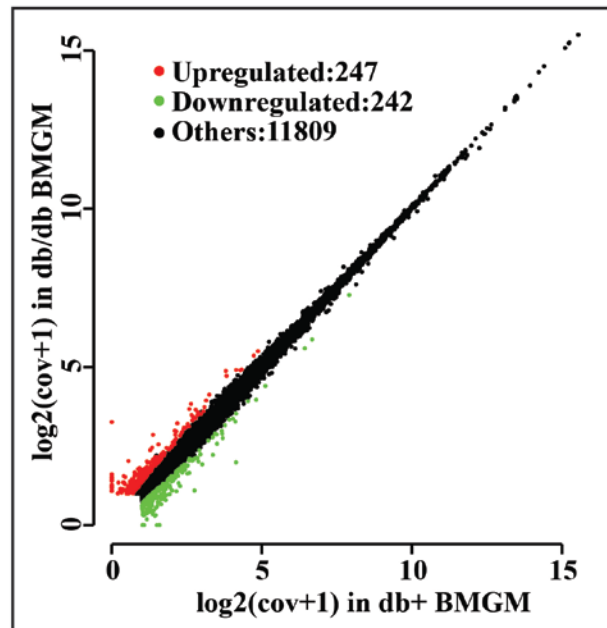

**Supplementary Figure 5.** Canonical Signaling Pathways enriched among differentially expressed genes (DEG) in db/dbBMGM. DEG (with minimum coverage of 1 and ≥ 1.5 fold change) were analyzed by Ingenuity Pathway Analysis (IPA). Bar graph shows top 9 significantly enriched pathways.

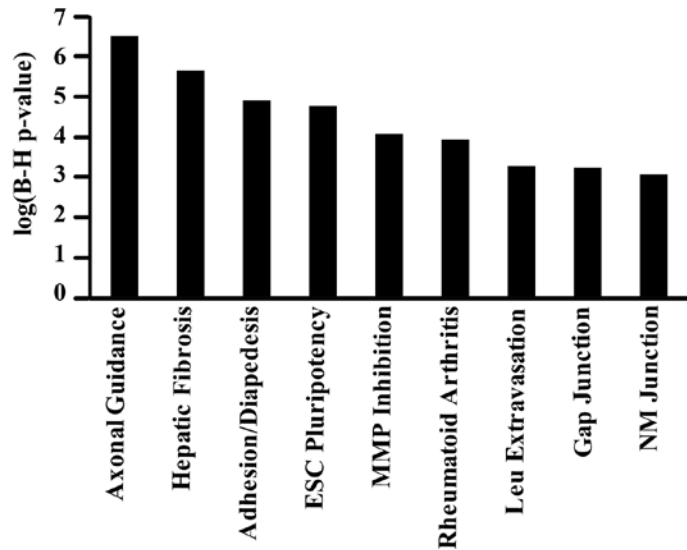

SUPPLEMENTARY DATA

**Supplementary Figure 6.** Enriched motifs (FDR < 5%) identified by GSEA among differentially expressed genes (DEG) in db/dbBMMC. All RefSeq genes were ranked based on fold change (log2 ratio) in each gene's expression between db/dbBMMC and db/+BMMC and analyzed by pre-ranked GSEA for enriched transcription factor binding sites. Results showed that the promoters ( $\pm 2$  kb from transcription start sites) of upregulated genes were significantly enriched (FDR < 5%) with Serum Response Factor (SRF) motifs.

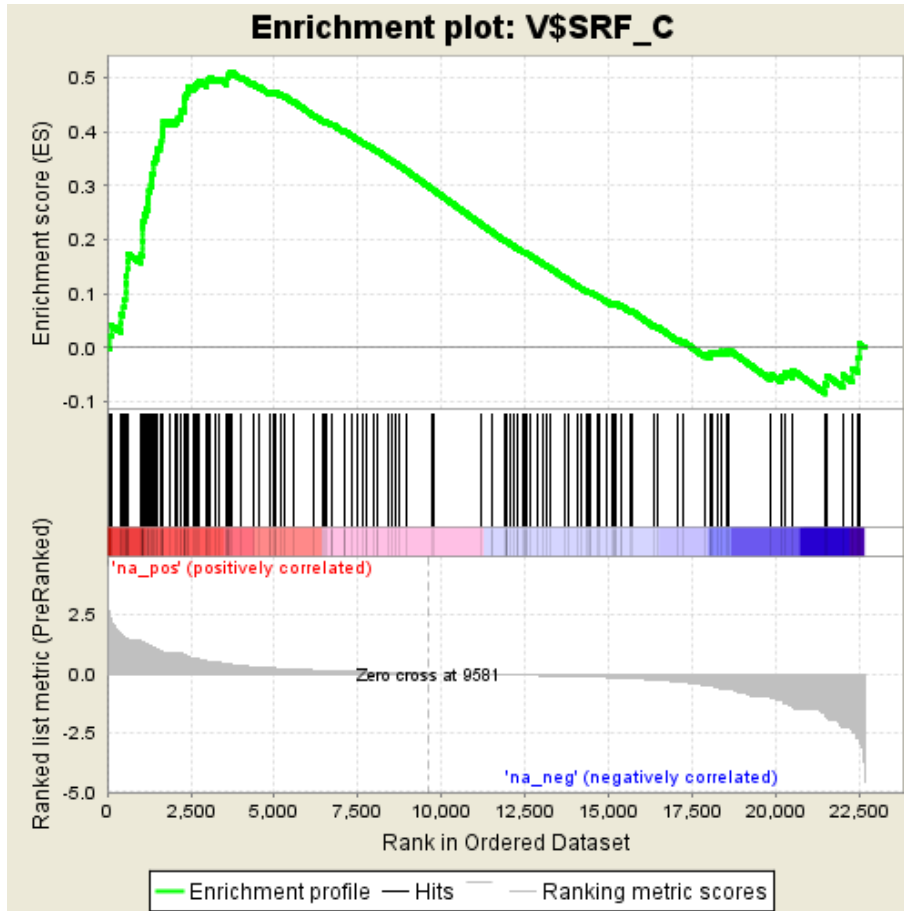

SUPPLEMENTARY DATA

**Supplementary Figure 7.** Regulation of inflammatory genes by E330013P06 in BMMC. (A-B) BMMC from normal C57BL/6 mice were transiently transfected with E33 or GFP control (CV) expression vectors. Expression of E33 mRNA (A) and mRNAs of the indicated inflammatory genes (B) was determined by RT-QPCR 48 h post transfection. Results were expressed as fold over GFP transfected cells (CV). Data are represented as Mean±SEM (n=2).

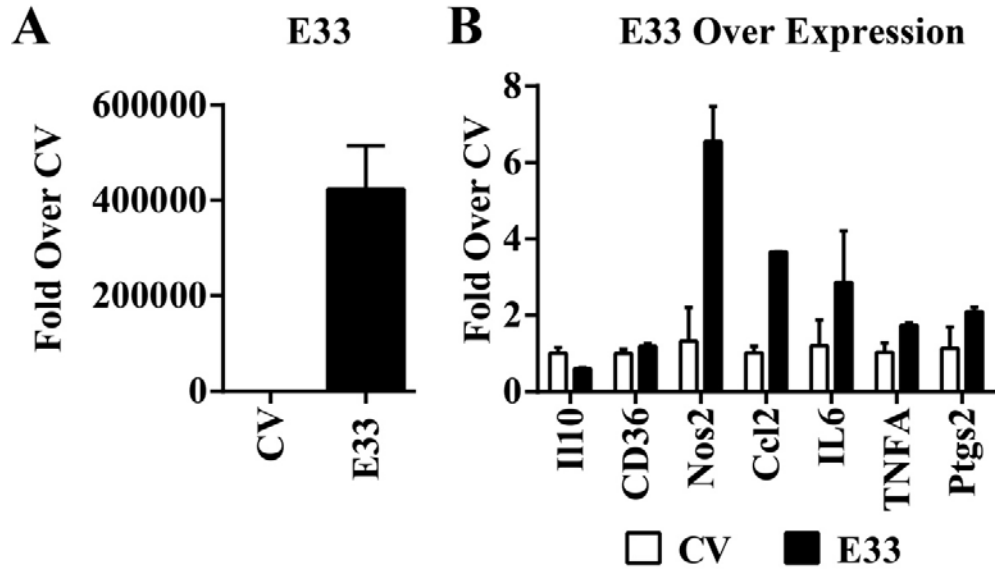

**Supplementary Table 1.** Alignment Summary of RNA-seq Data Analysis.

|               | db/+BMGM   | db/dbBMGM  | db/+BMMC   | db/dbBMMC  |
|---------------|------------|------------|------------|------------|
| Total Reads   | 50,280,104 | 49,644,878 | 54,959,198 | 49,598,692 |
| Aligned Reads | 39,869,517 | 39,800,076 | 42,441,619 | 39,777,530 |
| Exon Reads    | 14,382,802 | 15,150,865 | 13,524,428 | 14,580,453 |
| rRNA Reads    | 13,928,610 | 12,049,716 | 14,176,581 | 11,977,409 |
| % Aligned     | 79.29%     | 80.17%     | 77.22%     | 80.20%     |
| % Exon        | 36.07%     | 38.07%     | 31.87%     | 36.65%     |
| %r RNA        | 34.94%     | 30.28%     | 33.40%     | 30.11%     |

SUPPLEMENTARY DATA

**Supplementary Table 2.** Sequences of primers used in PCR and siRNA oligonucleotides used in this study.

| Gene ID                             | Forward                                                   | Reverse                     |
|-------------------------------------|-----------------------------------------------------------|-----------------------------|
| <b>QPCR Primers (Mouse)</b>         |                                                           |                             |
| Actb                                | ACCTTCTACAATGAGCTGCG                                      | CTGGATGGCTACGTACATGG        |
| Arg1                                | TGCATATCTGCCAAAGACATCG                                    | CGTAGAAGTGTTCCTCCAGGGTCTACG |
| Ccl2                                | AGGTCCCTGTCATGCTTCTGG                                     | CAGCACTTCTTTGGGACACCTGCTG   |
| Cd36                                | GATGACGTGGCAAAGAACAG                                      | TCCTCGGGGTCTGAGTTAT         |
| E33                                 | GGCCTCCACCTCCGAAGA                                        | GAATCCTACCAGCCATCACTC       |
| Il6                                 | ACAAAGCCAGAGTCCTTCAGAG                                    | ACCACAGTGAGGAATGTCCAC       |
| Il10                                | TGCTTCTATGCAGTTGATGAAGAT                                  | AGCTCCAAGACCAAGGTGTC        |
| Nos2                                | CCTGGAGACCCACACACTGG                                      | CACAGCCACATTGATCTCCG        |
| Pip2a                               | TTCTTGCTGTCTTTGGAACCTTTGTC                                | ATGGTCAACCCCACCGTGT         |
| Ptgs2                               | CGGTTTTGAGTTTGAAGTGGTAACCG                                | GAGCAACTATTCCAAACCAGCA      |
| Tgfb                                | GGGGTCTACAACCAACACAACCCG                                  | GCAGGAGCGCACAATCATGT        |
| Tnf                                 | TGTTGCCTCCTCTTTTGCTT                                      | TGGTCACCAAATCAGCGTTA        |
| <b>Taqman Assay Primers (Mouse)</b> |                                                           |                             |
| E330013P06                          | TGTGACAGTATCCGGCCAATGCTA                                  | ACACTATGGGAAAGCCACTGGGAT    |
| E330013P06-Probe                    | ATTTCACCRATCCTCCTATGCTCTGC                                |                             |
| <b>siRNAs (Mouse)</b>               |                                                           |                             |
| siE33-Pr-1                          | GAGACAUCUUCUGAAGACAUU                                     | UGUCUUCAGAAGAUGUCUCUU       |
| siE33-Pr-2                          | GUUCUGUGACAGUAAUAAAUU                                     | UUUAAUACUGUCACAGAACUU       |
| siE33-Pr-3                          | GAAGACAUUUCUGAAGAGAUU                                     | UCUCUUCAGAAAUGUCUUCUU       |
| siNTC                               | ON-TARGET Plus Non-targeting siRNA #1 (Thermo Scientific) |                             |
| <b>QPCR primers (Human)</b>         |                                                           |                             |
| MIR143HG                            | AGGGCCAGCAGCAGGC                                          | TCAGGAAATGTCTCTGGCTGTG      |
| PPIA                                | GACTGAGTGGTTGGATGGCAAG                                    | CGCTTATTCCTGGACCCAAAGCG     |

SUPPLEMENTARY DATA

**Supplementary Table 3.** Differentially expressed Refseq lncRNAs identified by RNA-seq in db/dbBMMC relative to db/+BMMC. Table showing differentially expressed known lncRNAs and nearby differentially-expressed genes (DEG) including miRNAs (coverage  $\geq 1$  in at least one sample and fold change  $\geq 1.5$ ) located within 500kb flanking regions of lncRNAs in db/dbBMMC.

| Symbol         | Raw Reads |       | Normalized Coverage |       | log2 Ratio | DEG(s) * located <500kb       |                    | miRNAs located < 500kb |                               |
|----------------|-----------|-------|---------------------|-------|------------|-------------------------------|--------------------|------------------------|-------------------------------|
|                | db/+      | db/db | db/+                | db/db |            | Symbol                        | log2 Ratio         | within lncRNA          | Nearby                        |
| Gm6578         | 0         | 12    | 0                   | 1.06  | 3.52       |                               |                    |                        |                               |
| Olfir856-ps1   | 5         | 34    | 0.29                | 1.8   | 2.41       |                               |                    |                        |                               |
| 2010009K17Rik  | 4         | 17    | 0.49                | 2.58  | 2.04       |                               |                    |                        |                               |
| Gm16596        | 6         | 30    | 0.37                | 1.68  | 2.02       | Eml1, Hhipl1                  | 1.1, 1.27          |                        | miR345                        |
| 2700086A05Rik  | 2         | 11    | 0.23                | 1.15  | 1.87       | Hoxa10, Hoxa5, Hoxa9          | 1.92, 1.46, 0.69   |                        | miRa, miR196b                 |
| Gm6634         | 7         | 28    | 0.37                | 1.35  | 1.73       |                               |                    |                        |                               |
| D030025P21Rik  | 18        | 66    | 0.43                | 1.45  | 1.69       | Ltp2                          | 1.34               |                        |                               |
| Dnm3os         | 218       | 769   | 2.61                | 8.45  | 1.69       |                               |                    | miR199a-2, miR214      | miR199a-2, miR214             |
| 0610007N19Rik  | 25        | 89    | 1.6                 | 5.22  | 1.66       | Snord123                      | 0.9                |                        |                               |
| 4933436C20Rik  | 6         | 24    | 0.46                | 1.6   | 1.65       | Mmp2, Irx5                    | 1.37, 1.1          |                        |                               |
| Has2as         | 5         | 20    | 0.98                | 3.37  | 1.61       | Has2                          | 1.17               |                        |                               |
| 3110045C21Rik  | 6         | 21    | 0.5                 | 1.61  | 1.52       | Ddr2, Rgs4, Hsd17b7           | 1.57, 2.62, 0.63   |                        |                               |
| 2610203C20Rik  | 179       | 545   | 6.6                 | 18.41 | 1.47       |                               |                    | miR125b-1              | miR100, miRlet7a-2, miR125b-1 |
| Gm11149        | 15        | 47    | 1.12                | 3.19  | 1.46       | Ncam1                         | 1.2                |                        |                               |
| 2810408I11Rik  | 7         | 23    | 0.94                | 2.8   | 1.46       | Ccnyl1                        | 0.89               |                        |                               |
| E330013P06     | 28        | 80    | 1.95                | 5.12  | 1.36       | Arhgef37, Ppargc1b, LOC545261 | -0.81, -0.65, 0.59 | miR145, miR143         | miR145, miR143                |
| Rps4y2         | 31        | 86    | 3.13                | 7.95  | 1.32       |                               |                    |                        |                               |
| 4930429B21Rik  | 25        | 65    | 1.17                | 2.9   | 1.27       |                               |                    |                        |                               |
| A330069E16Rik  | 10        | 28    | 1.06                | 2.73  | 1.27       | Pacsin3                       | 1.36               |                        |                               |
| 2810047C21Rik1 | 27        | 69    | 1.56                | 3.64  | 1.2        |                               |                    |                        |                               |
| St5            | 125       | 312   | 2.61                | 5.98  | 1.19       |                               |                    |                        |                               |



SUPPLEMENTARY DATA

|                      |     |     |       |        |      |                              |                 |  |         |
|----------------------|-----|-----|-------|--------|------|------------------------------|-----------------|--|---------|
| <b>Gm7334</b>        | 60  | 150 | 4.19  | 9.59   | 1.18 | Btg3                         | 1.18            |  |         |
| <b>2810403D21Rik</b> | 8   | 21  | 0.75  | 1.81   | 1.16 |                              |                 |  |         |
| <b>C130083M11Rik</b> | 17  | 40  | 0.78  | 1.67   | 1.06 | Sod3                         | 1.39            |  |         |
| <b>1700007L15Rik</b> | 16  | 38  | 2.03  | 4.3    | 1.04 | Heg1                         | 0.89            |  | miR1947 |
| <b>Gm2115</b>        | 125 | 275 | 6.37  | 12.79  | 1    | 9930013L23Rik,<br>Fah, Arnt2 | 1.6, 0.98, 0.71 |  |         |
| <b>Tubb2a-ps2</b>    | 16  | 36  | 2.16  | 4.45   | 1    |                              |                 |  |         |
| <b>E130310I04Rik</b> | 25  | 54  | 0.63  | 1.25   | 0.96 | Mylk, Kalrn                  | 1.24, 0.96      |  |         |
| <b>C630043F03Rik</b> | 36  | 74  | 1.27  | 2.4    | 0.89 |                              |                 |  |         |
| <b>A130040M12Rik</b> | 85  | 172 | 2.5   | 4.64   | 0.88 | Gm5141                       | 0.6             |  | miR713  |
| <b>Gm10941</b>       | 7   | 15  | 0.94  | 1.84   | 0.88 |                              |                 |  | miR1930 |
| <b>4921511C10Rik</b> | 24  | 49  | 1.56  | 2.91   | 0.87 |                              |                 |  |         |
| <b>B430319G15Rik</b> | 24  | 49  | 0.56  | 1.05   | 0.87 | Plod2, Plscr2                | 1.5, 1.46       |  |         |
| <b>D4Ert617e</b>     | 26  | 51  | 2.95  | 5.5    | 0.87 | Ptprf, Mpl                   | 0.71, 0.61      |  |         |
| <b>4930447K03Rik</b> | 24  | 47  | 2.2   | 3.94   | 0.82 |                              |                 |  |         |
| <b>9130206I24Rik</b> | 33  | 64  | 1.09  | 1.94   | 0.81 |                              |                 |  |         |
| <b>D430020J02Rik</b> | 63  | 121 | 2.07  | 3.64   | 0.8  |                              |                 |  |         |
| <b>2610019E17Rik</b> | 19  | 36  | 6.09  | 10.57  | 0.76 | Dnase1l2, Slc9a3r2           | -1.12, 0.79     |  | miR5134 |
| <b>4732491K20Rik</b> | 28  | 52  | 0.84  | 1.43   | 0.74 |                              |                 |  |         |
| <b>E130304I02Rik</b> | 4   | 8   | 0.54  | 1      | 0.73 | Zfp507                       | 1.02            |  |         |
| <b>LOC100642166</b>  | 39  | 71  | 2.39  | 3.98   | 0.72 | Gm15787, Gm10416             | -0.66, -0.78    |  |         |
| <b>4933412E12Rik</b> | 47  | 85  | 2.59  | 4.29   | 0.72 | Kcnmb4                       | 0.99            |  |         |
| <b>Fcrla</b>         | 13  | 24  | 0.72  | 1.21   | 0.71 | Olfml2b, Adamts4             | 1.13, 0.67      |  |         |
| <b>Snhg1</b>         | 185 | 329 | 36.21 | 58.99  | 0.7  |                              |                 |  | miR5136 |
| <b>Pvt1</b>          | 95  | 168 | 2.93  | 4.75   | 0.69 | Myc                          | 0.65            |  |         |
| <b>Ccl25</b>         | 27  | 48  | 2     | 3.26   | 0.68 | Ctxn1, Cd209d                | 1.33, 1.05      |  |         |
| <b>4930581F22Rik</b> | 76  | 132 | 3     | 4.78   | 0.66 | Cdon                         | 1               |  |         |
| <b>9130024F11Rik</b> | 30  | 52  | 0.76  | 1.21   | 0.65 |                              |                 |  |         |
| <b>Gm15421</b>       | 575 | 979 | 67.44 | 105.18 | 0.64 |                              |                 |  |         |
| <b>Gm14005</b>       | 44  | 75  | 0.93  | 1.45   | 0.63 |                              |                 |  |         |

SUPPLEMENTARY DATA

|                      |     |     |       |       |       |                                      |                             |                           |
|----------------------|-----|-----|-------|-------|-------|--------------------------------------|-----------------------------|---------------------------|
| <b>Gm14057</b>       | 18  | 31  | 0.8   | 1.26  | 0.63  | Gfra4                                | -1.77                       | miR103-2                  |
| <b>Gm10791</b>       | 40  | 68  | 2.29  | 3.57  | 0.63  |                                      |                             | miR155                    |
| <b>1700084J12Rik</b> | 5   | 9   | 0.66  | 1.07  | 0.62  | Sdc2                                 | 1.56                        |                           |
| <b>Gm13939</b>       | 23  | 39  | 1.62  | 2.51  | 0.61  | Lgr4                                 | 1.33                        |                           |
| <b>A830082N09Rik</b> | 113 | 189 | 1.37  | 2.1   | 0.61  | Fam26e, Col10a1, Frk                 | 1.4, 0.86, 0.98             |                           |
| <b>Npff</b>          | 43  | 72  | 4.07  | 6.25  | 0.61  | Sp7, Hoxc10, Hoxc9, Hoxc6, Igfbp6    | 1.49, 1.07, 1.46, 1.2, 0.93 | miR688, miR196a-2, miR615 |
| <b>3000002C10Rik</b> | 16  | 27  | 1.19  | 1.84  | 0.6   |                                      |                             |                           |
| <b>LOC545261</b>     | 24  | 40  | 3.67  | 5.59  | 0.59  | E330013P06, Arhgef37, Ppargc1b       | 1.36, -0.81, -0.65          | miR145, miR143            |
| <b>AI507597</b>      | 21  | 35  | 2.31  | 3.52  | 0.59  | Epha2, B330016D10Rik, Gm10565, Hspb7 | 1.6, -0.63, -0.71, 0.77     |                           |
| <b>Gm5434</b>        | 46  | 33  | 3.01  | 1.98  | -0.59 |                                      |                             |                           |
| <b>Alms1-ps2</b>     | 20  | 14  | 1.61  | 1.04  | -0.6  |                                      |                             | miR705                    |
| <b>Gm11747</b>       | 27  | 19  | 1.56  | 1     | -0.6  |                                      |                             |                           |
| <b>Gm10677</b>       | 661 | 474 | 29.87 | 19.62 | -0.61 |                                      |                             |                           |
| <b>A530088E08Rik</b> | 254 | 181 | 13.45 | 8.78  | -0.61 |                                      |                             |                           |
| <b>C330013E15Rik</b> | 40  | 28  | 4.32  | 2.77  | -0.62 | AB099516, Mettl7a2                   | -1.18, -0.97                |                           |
| <b>B330016D10Rik</b> | 154 | 108 | 6.8   | 4.37  | -0.63 | Epha2, Hspb7, AI507597               | 1.6, 0.77, 0.59             |                           |
| <b>4930513N10Rik</b> | 132 | 91  | 4.44  | 2.83  | -0.65 | Ndr4                                 | 1.82                        | miR1186b                  |
| <b>LOC626693</b>     | 25  | 17  | 1.53  | 0.95  | -0.65 |                                      |                             | miR568                    |
| <b>Gm9920</b>        | 51  | 35  | 5.16  | 3.24  | -0.65 | Dscc1, Enpp2, Nov                    | 1.82, 0.95, -0.79           |                           |
| <b>Gm13845</b>       | 15  | 10  | 1.48  | 0.9   | -0.65 |                                      |                             | miR29a, miR29b-1          |
| <b>4931440J10Rik</b> | 28  | 19  | 2.96  | 1.84  | -0.66 | Fam124a, Serpine3                    | 1.52, 0.87                  |                           |
| <b>Gm11648</b>       | 67  | 46  | 2.33  | 1.47  | -0.66 |                                      |                             |                           |
| <b>Gm15787</b>       | 119 | 82  | 8.09  | 5.1   | -0.66 | LOC100642166, Gm10416                | 0.72, -0.78                 |                           |

SUPPLEMENTARY DATA

|                      |     |     |       |      |       |                                   |                    |         |
|----------------------|-----|-----|-------|------|-------|-----------------------------------|--------------------|---------|
| <b>Pldi</b>          | 18  | 13  | 2     | 1.21 | -0.66 | Pcbd1, Unc5b, Adamts14            | -1.01, 0.93, 0.7   |         |
| <b>LOC100859962</b>  | 21  | 14  | 3.81  | 2.32 | -0.67 | Blm, Kif7                         | 0.65, 0.81         | miR1965 |
| <b>4930441O14Rik</b> | 43  | 29  | 1.41  | 0.87 | -0.67 |                                   |                    |         |
| <b>1810012K16Rik</b> | 11  | 7   | 1.93  | 1.12 | -0.69 | Plat, Thsd1                       | 1.16, 0.89         |         |
| <b>4931403E22Rik</b> | 11  | 7   | 1.56  | 0.91 | -0.69 | Vldlr                             | 1.46               |         |
| <b>Gm10390</b>       | 129 | 86  | 3.08  | 1.88 | -0.7  | Sds                               | -2.57              |         |
| <b>2900060B14Rik</b> | 59  | 39  | 9.38  | 5.69 | -0.71 |                                   |                    |         |
| <b>Gm10565</b>       | 74  | 49  | 3.99  | 2.42 | -0.71 | AI507597                          | 0.59               |         |
| <b>1110006O24Rik</b> | 31  | 20  | 3.84  | 2.26 | -0.73 | Msi1                              | 2.14               |         |
| <b>5730405O15Rik</b> | 54  | 35  | 5.78  | 3.43 | -0.73 | Gm4984                            | 1.25               |         |
| <b>5031425F14Rik</b> | 235 | 153 | 13.58 | 8.13 | -0.74 |                                   |                    |         |
| <b>Gm17745</b>       | 16  | 10  | 1.77  | 1.01 | -0.74 | Ntn4, Ccdc38                      | 1.65, 0.73         | miR1931 |
| <b>Gm15880</b>       | 44  | 28  | 1.45  | 0.84 | -0.76 | Blm, Zscan2, Nmb                  | 0.65, -0.91, 0.6   | miR1965 |
| <b>2010001M06Rik</b> | 10  | 6   | 1.88  | 1.03 | -0.76 | Vps37d, Stx1a                     | 1.25, 0.65         |         |
| <b>Gm10416</b>       | 18  | 11  | 2.66  | 1.49 | -0.78 | Gm15787, LOC100642166             | -0.66, 0.72        |         |
| <b>Gm9199</b>        | 40  | 25  | 2.95  | 1.69 | -0.78 |                                   |                    | miR687  |
| <b>D930015M05Rik</b> | 34  | 21  | 2.71  | 1.53 | -0.79 | Syt13, Mdk                        | 1.28, 0.6          | miR1955 |
| <b>Gm16617</b>       | 15  | 9   | 2     | 1.09 | -0.79 | Snord58b, Arhgef40, G630016D24Rik | -1.54, 0.62, -0.88 |         |
| <b>Gm16386</b>       | 28  | 17  | 4.45  | 2.47 | -0.81 |                                   |                    |         |
| <b>A430088P11Rik</b> | 124 | 76  | 2.62  | 1.47 | -0.82 |                                   |                    | miR5113 |
| <b>G730013B05Rik</b> | 48  | 29  | 1.59  | 0.88 | -0.83 |                                   |                    |         |
| <b>2900005J15Rik</b> | 177 | 108 | 8.28  | 4.63 | -0.83 | Smarcd3                           | 0.76               |         |
| <b>1700025N23Rik</b> | 27  | 16  | 2.84  | 1.53 | -0.84 | Klrg2                             | 0.78               |         |
| <b>1700012D14Rik</b> | 47  | 28  | 7.07  | 3.86 | -0.85 | Adm                               | 1.57               |         |
| <b>4930405A21Rik</b> | 11  | 6   | 1.05  | 0.52 | -0.88 | Myl9                              | 1.36               |         |
| <b>Bc1</b>           | 1   | 0   | 1.23  | 0    | -0.96 |                                   |                    |         |
| <b>Gm9054</b>        | 28  | 15  | 3.75  | 1.85 | -0.97 | Ctsk, Ecml, Bola1                 | 1.19, 0.59, -0.79  |         |
| <b>A930007I19Rik</b> | 48  | 26  | 1.97  | 0.97 | -0.98 | Gm9895                            | -1.94              | miR101b |

SUPPLEMENTARY DATA

|                      |     |    |      |      |       |                                                             |                                         |  |          |
|----------------------|-----|----|------|------|-------|-------------------------------------------------------------|-----------------------------------------|--|----------|
| <b>Gpx2-ps1</b>      | 25  | 13 | 2.34 | 1.11 | -1.01 | P4ha3, Dnajb13,<br>Plekhhb1                                 | 1.52, -0.74, -0.73                      |  |          |
| <b>Gm13807</b>       | 35  | 18 | 2.56 | 1.21 | -1.04 | Syt13, Trp53i11,<br>Prdm11                                  | 1.28, -0.95, -0.68                      |  |          |
| <b>Slc22a13b</b>     | 20  | 11 | 1.3  | 0.6  | -1.04 | Plcd1                                                       | 0.93                                    |  | miR26a-1 |
| <b>A730085K08Rik</b> | 7   | 3  | 1.18 | 0.46 | -1.09 |                                                             |                                         |  | miR138-1 |
| <b>2610035D17Rik</b> | 169 | 87 | 8.68 | 4.05 | -1.09 |                                                             |                                         |  |          |
| <b>Gm6277</b>        | 19  | 9  | 1.27 | 0.55 | -1.11 |                                                             |                                         |  | miR1901  |
| <b>2610203C22Rik</b> | 35  | 17 | 2.66 | 1.18 | -1.12 | Mybl1, Snord87                                              | 0.85, 0.77                              |  |          |
| <b>3300005D01Rik</b> | 24  | 11 | 1.77 | 0.75 | -1.17 | Ldhal6b                                                     | 0.81                                    |  |          |
| <b>D930028M14Rik</b> | 18  | 7  | 1.59 | 0.57 | -1.35 | Ceacam2, Ceacam10                                           | -0.62, -0.9                             |  |          |
| <b>Gm12060</b>       | 16  | 6  | 1.94 | 0.66 | -1.38 |                                                             |                                         |  |          |
| <b>4932441J04Rik</b> | 9   | 3  | 1.18 | 0.36 | -1.41 |                                                             |                                         |  |          |
| <b>AI463170</b>      | 9   | 3  | 1.58 | 0.48 | -1.41 |                                                             |                                         |  | miR5135  |
| <b>4930520O04Rik</b> | 31  | 12 | 2.34 | 0.83 | -1.41 | Susd5, Cmtm8,<br>Bcl2a1c                                    | 2.35, -0.65, 0.73                       |  |          |
| <b>4930471G03Rik</b> | 9   | 2  | 1.28 | 0.25 | -1.81 | Hbegf,<br>2010001M09Rik,<br>Nrg2, Spata24,<br>0610010O12Rik | 1.01,<br>3.13,<br>-1.08, 1.02,<br>-0.69 |  |          |
| <b>Gm9895</b>        | 10  | 2  | 1.43 | 0.26 | -1.94 | Slc1a1,<br>A930007I19Rik                                    | 1.87, -0.98                             |  | miR101b  |
| <b>Rprl1</b>         | 3   | 0  | 1.17 | 0    | -1.94 |                                                             |                                         |  |          |
| <b>Gm16833</b>       | 8   | 1  | 1.12 | 0.13 | -2.21 | Arhgap42                                                    | 2.23                                    |  |          |
| <b>A930041C12Rik</b> | 21  | 3  | 3.52 | 0.48 | -2.47 | Tgfbr3, Gfi1                                                | 0.84, -0.94                             |  |          |

SUPPLEMENTARY DATA

**Supplementary Table 4.** Differentially expressed novel lncRNAs identified by RNA-seq in db/dbBMMC relative to db/+BMMC. Table showing differentially expressed novel lncRNAs and nearby differentially-expressed genes (DEG) including miRNAs (coverage  $\geq 1$  in at least one sample and fold change  $\geq 1.5$ ) located within 500kb flanking regions of lncRNAs in db/dbBMMC.

| Symbol      | Chr   | Gene Start | Gene End | Strand | Normalized coverage |       | log2 Ratio | DEG(s) * located <500kb                      |                             |
|-------------|-------|------------|----------|--------|---------------------|-------|------------|----------------------------------------------|-----------------------------|
|             |       |            |          |        | db/+                | db/db |            | Symbol                                       | log2 Ratio                  |
| XLOC_009934 | chr14 | 53988397   | 54080873 | +      | 0.46                | 1.19  | 1.26       |                                              |                             |
| XLOC_008488 | chr13 | 52655656   | 52668673 | +      | 2.73                | 1.41  | -0.93      |                                              |                             |
| XLOC_022091 | chr3  | 1.17E+08   | 1.17E+08 | -      | 1.65                | 0.89  | -0.8       |                                              |                             |
| XLOC_027444 | chr6  | 52108422   | 52112151 | +      | 4.4                 | 8.44  | 0.93       | Hoxa10, Hoxa5,<br>2700086A05Rik, Hoxa9       | 1.92, 1.46,<br>1.87, 0.69   |
| XLOC_013863 | chr17 | 26122835   | 26125865 | +      | 0.68                | 1.45  | 1.06       | Arhgdig                                      | 0.7                         |
| XLOC_025108 | chr5  | 64436202   | 64439498 | +      | 1.04                | 1.78  | 0.71       |                                              |                             |
| XLOC_005286 | chr11 | 1.22E+08   | 1.22E+08 | +      | 1.29                | 0.68  | -0.9       |                                              |                             |
| XLOC_016083 | chr18 | 5141738    | 5142989  | -      | 0.89                | 1.88  | 0.91       | Zeb1                                         | 0.59                        |
| XLOC_018358 | chr2  | 75616068   | 75620823 | +      | 1.11                | 0.55  | -1         | Ttc30a2                                      | 0.61                        |
| XLOC_003162 | chr10 | 11019155   | 11028604 | -      | 2.38                | 3.87  | 0.7        |                                              |                             |
| XLOC_018419 | chr2  | 90910643   | 90912849 | +      | 3.34                | 1.82  | -0.87      | Pacsin3, A330069E16Rik                       | 1.36, 1.27                  |
| XLOC_011486 | chr15 | 96291630   | 96294025 | +      | 1.45                | 2.32  | 0.66       |                                              |                             |
| XLOC_013712 | chr17 | 17232861   | 17290922 | +      | 0.91                | 1.51  | 0.76       |                                              |                             |
| XLOC_006812 | chr12 | 8516892    | 8528038  | +      | 1.76                | 2.75  | 0.64       | Wdr35                                        | 0.78                        |
| XLOC_032799 | chr8  | 64391485   | 64392225 | -      | 2.96                | 1.18  | -1.25      |                                              |                             |
| XLOC_032233 | chr8  | 94326573   | 94328652 | +      | 0.18                | 1.14  | 2.46       | Irx3, Rpgrip1l                               | 1.70, 0.98                  |
| XLOC_000064 | chr1  | 23263129   | 23269201 | +      | 0.91                | 2.61  | 1.49       |                                              |                             |
| XLOC_015981 | chr18 | 61799279   | 61805019 | +      | 3.75                | 5.76  | 0.62       | E330013P06, Arhgef37,<br>Ppargc1b, LOC545261 | 1.36, -0.81,<br>-0.65, 0.59 |
| XLOC_023056 | chr4  | 1.17E+08   | 1.17E+08 | +      | 2.31                | 3.86  | 0.74       | Tmem53                                       | 1.2                         |

SUPPLEMENTARY DATA

|                    |       |          |          |   |      |       |       |                                                   |                                |
|--------------------|-------|----------|----------|---|------|-------|-------|---------------------------------------------------|--------------------------------|
| <b>XLOC_022689</b> | chr4  | 16091268 | 16120188 | + | 2.13 | 4.34  | 1.02  | Ripk2                                             | 0.88                           |
| <b>XLOC_018094</b> | chr2  | 27951034 | 27966815 | + | 2.26 | 1.39  | -0.64 | Col5a1                                            | 1.53                           |
| <b>XLOC_023859</b> | chr4  | 94863603 | 94873653 | - | 1.23 | 0.66  | -0.8  |                                                   |                                |
| <b>XLOC_026751</b> | chr5  | 1.50E+08 | 1.50E+08 | - | 0.78 | 1.39  | 0.83  | 6330406I15Rik                                     | 2.04                           |
| <b>XLOC_000226</b> | chr1  | 58562003 | 58568784 | + | 0.5  | 1.26  | 1.24  | Aox1                                              | 1.01                           |
| <b>XLOC_036089</b> | chrX  | 1.48E+08 | 1.48E+08 | + | 5.98 | 10.15 | 0.76  | Ribc1                                             | 0.66                           |
| <b>XLOC_034159</b> | chr9  | 78276728 | 78277861 | + | 0.77 | 1.29  | 0.67  | Cd109, Gsta4                                      | 1.28, 1.80                     |
| <b>XLOC_013680</b> | chr17 | 12511770 | 12518247 | + | 0.96 | 2.6   | 1.4   | 4732491K20Rik                                     | 0.74                           |
| <b>XLOC_001697</b> | chr1  | 1.56E+08 | 1.56E+08 | - | 1.99 | 3.66  | 0.87  | Rgs16                                             | 1.06                           |
| <b>XLOC_015899</b> | chr18 | 46774320 | 46776318 | + | 1.97 | 0.48  | -1.86 | Cdo1                                              | 2.15                           |
| <b>XLOC_024009</b> | chr4  | 1.26E+08 | 1.26E+08 | - | 2.21 | 0.82  | -1.4  |                                                   |                                |
| <b>XLOC_015977</b> | chr18 | 61607867 | 61609225 | + | 1.68 | 0.59  | -1.51 | Pdgfrb, E330013P06, Arhgef37, Ppargc1b, LOC545261 | 1.41, 1.36, -0.81, -0.65, 0.59 |
| <b>XLOC_020121</b> | chr2  | 1.74E+08 | 1.74E+08 | - | 1.57 | 0.28  | -2.36 | Pmepa1                                            | 0.94                           |
| <b>XLOC_030950</b> | chr7  | 1.21E+08 | 1.21E+08 | - | 1.06 | 2.01  | 0.92  | Rras2, Insc                                       | 1.35, 1.42                     |
| <b>XLOC_023440</b> | chr4  | 1.49E+08 | 1.49E+08 | + | 4.3  | 6.56  | 0.61  | Clstn1, Spsb1                                     | 0.87, 0.73                     |
| <b>XLOC_028216</b> | chr6  | 54680226 | 54710351 | - | 1.6  | 0.82  | -0.95 | Fkbp14, Prr15, Ggct                               | 1.36, -1.33, 0.88              |
| <b>XLOC_021413</b> | chr3  | 1.31E+08 | 1.31E+08 | + | 2.08 | 1.34  | -0.63 | Sgms2                                             | 1.15                           |
| <b>XLOC_006144</b> | chr11 | 1.02E+08 | 1.02E+08 | - | 1.86 | 1.19  | -0.64 | Itga2b, Fzd2, Cd300lg, Gjc1                       | 0.92, 0.86, -0.73, 0.94        |

SUPPLEMENTARY DATA

|                    |       |          |          |   |      |      |       |                                     |                        |
|--------------------|-------|----------|----------|---|------|------|-------|-------------------------------------|------------------------|
| <b>XLOC_025312</b> | chr5  | 1.06E+08 | 1.06E+08 | + | 0.85 | 1.38 | 0.69  | Gbp6, Gbp10, Gbp11                  | -1.15, -1.21, -1.00    |
| <b>XLOC_006970</b> | chr12 | 36023137 | 36098218 | + | 1.43 | 2.52 | 0.79  |                                     |                        |
| <b>XLOC_027746</b> | chr6  | 1.18E+08 | 1.18E+08 | + | 1.59 | 2.5  | 0.64  | Ret, Rasgef1a                       | 1.22, -0.60            |
| <b>XLOC_029893</b> | chr7  | 1.24E+08 | 1.24E+08 | + | 0.77 | 1.89 | 1.27  |                                     |                        |
| <b>XLOC_034053</b> | chr9  | 60905344 | 60906877 | + | 0.77 | 2.3  | 1.43  | Uaca                                | 0.65                   |
| <b>XLOC_036042</b> | chrX  | 1.31E+08 | 1.31E+08 | + | 0.42 | 1.01 | 1.13  | .Armcx2, .Armcx1, .Timm8a1, .Armcx6 | 1.33, 1.50, 0.77, 0.69 |
| <b>XLOC_005445</b> | chr11 | 31607033 | 31612704 | - | 0.97 | 1.93 | 0.94  | Stc2                                | 1.6                    |
| <b>XLOC_026139</b> | chr5  | 53921133 | 53932057 | - | 2.03 | 1.28 | -0.67 |                                     |                        |
| <b>XLOC_014384</b> | chr17 | 73215869 | 73216863 | + | 2.12 | 0.94 | -1.14 |                                     |                        |
| <b>XLOC_023885</b> | chr4  | 1.06E+08 | 1.06E+08 | - | 3.45 | 2.07 | -0.71 |                                     |                        |
| <b>XLOC_017563</b> | chr19 | 40711748 | 40713128 | - | 4.25 | 2.55 | -0.72 | Sorbs1, Pdim1, Aldh18a1             | 1.37, 1.01, 0.75       |
| <b>XLOC_035826</b> | chrX  | 47890566 | 47903555 | + | 1.68 | 2.92 | 0.73  |                                     |                        |
| <b>XLOC_021059</b> | chr3  | 69411799 | 69415091 | + | 0.94 | 1.48 | 0.59  |                                     |                        |
| <b>XLOC_007906</b> | chr12 | 1.14E+08 | 1.14E+08 | - | 0.6  | 1.6  | 0.96  | Crip2, Tmem121                      | 1.14, 0.88             |
| <b>XLOC_004434</b> | chr11 | 57906304 | 57916714 | + | 1.13 | 0.75 | -0.72 |                                     |                        |
